# Supplementary material
Source: PubMed Central journal article supplement (PMC4976020)
Supplement: NIHMS796846-supplement-1.pdf [file NIHMS796846-supplement-1.pdf]

**Serum IL-6**

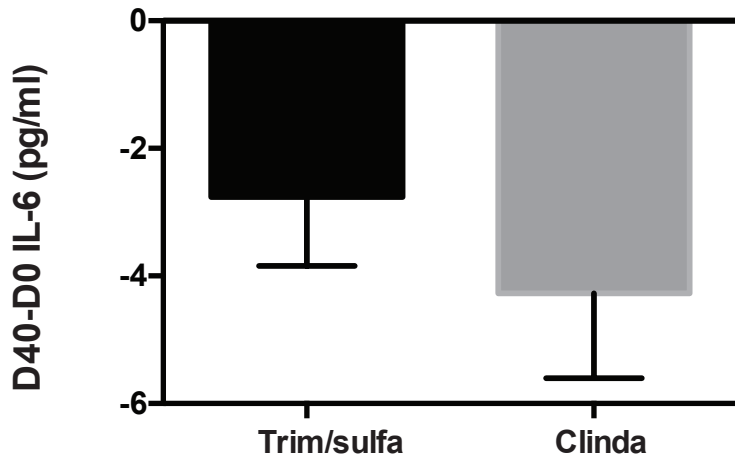

**IL-6 PBMC post-USA300 restimulation**

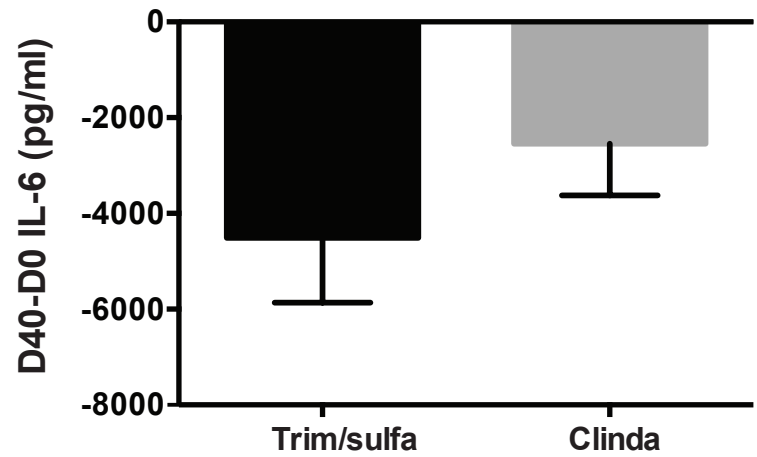

**IL-1 $\beta$  PBMC post-USA300 restimulation**

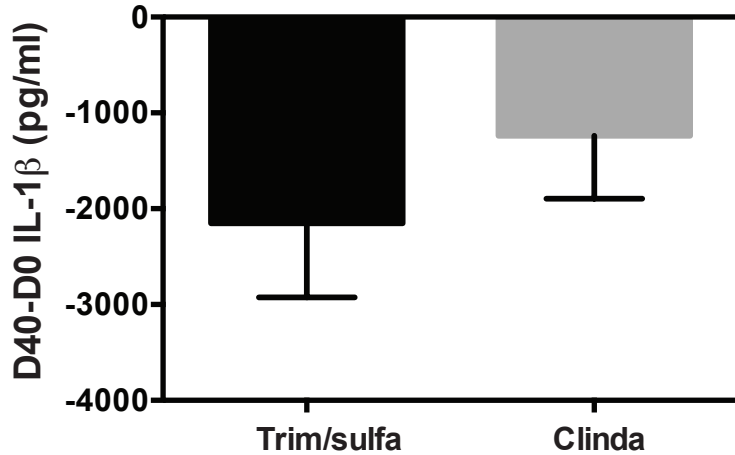

**TNF PBMC post-USA300 restimulation**

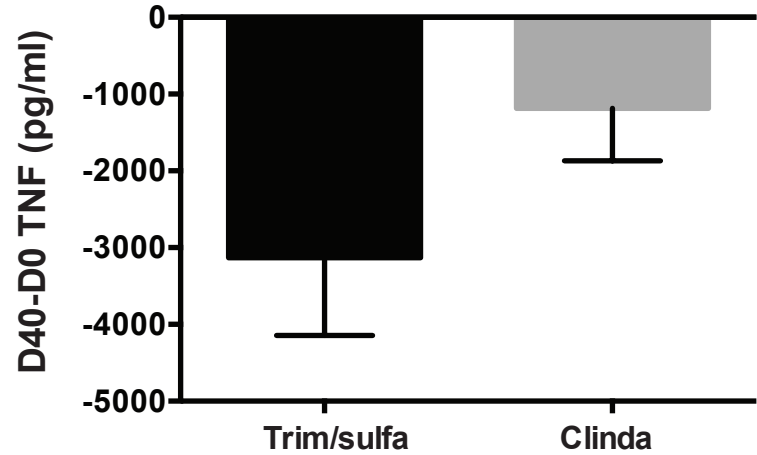

**Supplemental Figure 1. The reduction in cytokine levels in serum and supernatants of stimulated PBMCs between D0 and D40 was similar in patients treated with trimetoprim/sulfamethoxazole and clindamycin.** The difference in cytokine levels between D0 and D40 was measured for serum IL-6 (top left panel) and supernatants of USA300 sonicate-restimulated PBMCs for IL-6, IL-1 $\beta$  and TNF (other 3 panels). The plots represent the mean - SEM from patients treated with trimetoprim/sulfamethoxazole versus clindamycin (n=28/group). No statistical differences were found between the 2 groups.

**A****Stimulation of PBMCs from uninfected controls and SSTI patients:**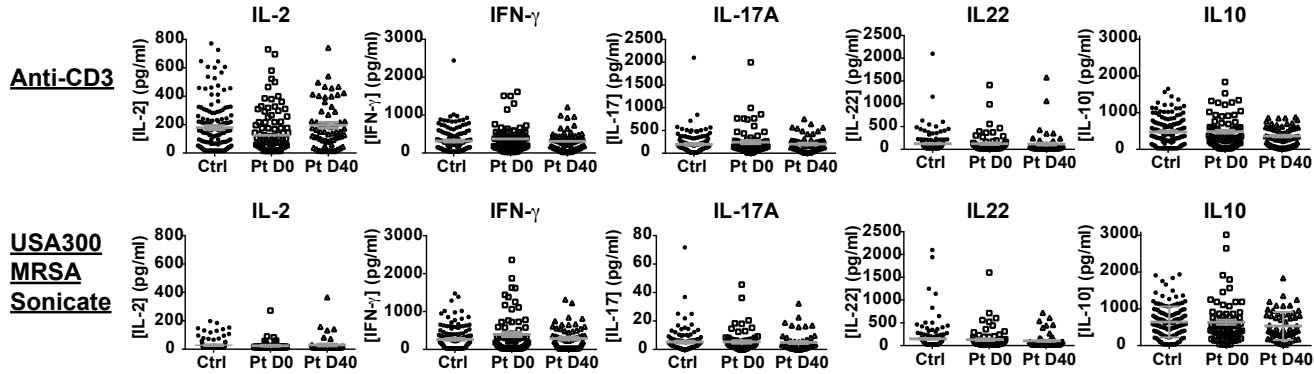**B****Stimulation of D0 PBMCs from SSTI patients:**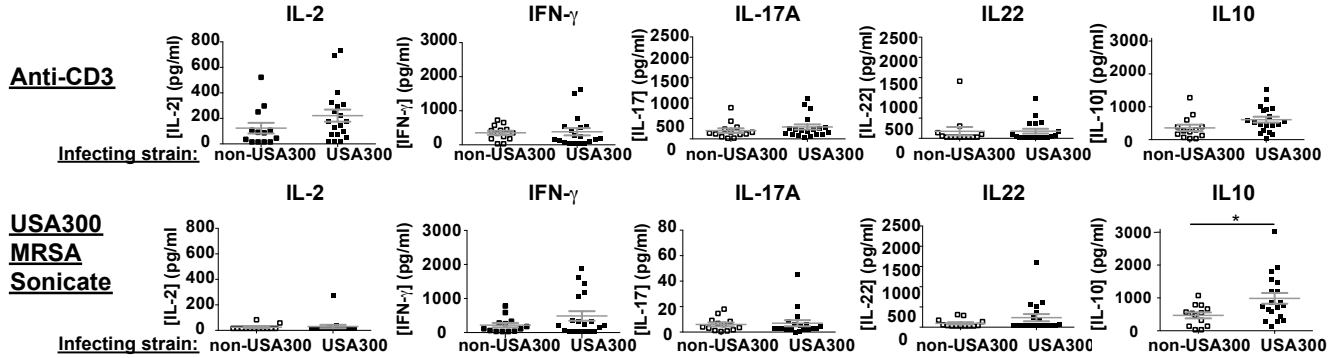

**Supplemental Figure 2. Adaptive cytokines are similar in SSTI patients and controls and in SSTI patients infected with non-USA300 and USA300 *S. aureus* strain types.** **A.** PBMCs from uninfected controls and infected patients were stimulated with anti-CD3 or USA300 MRSA sonicates and production of adaptive cytokines was measured in the supernatant at 24h by ELISA. **B.** Adaptive cytokines produced by PBMCs from SSTI patients with documented USA300 and non-USA300 infection were compared. Plots show Mean + SEM. \* $p < 0.05$ , Mann-Whitney.

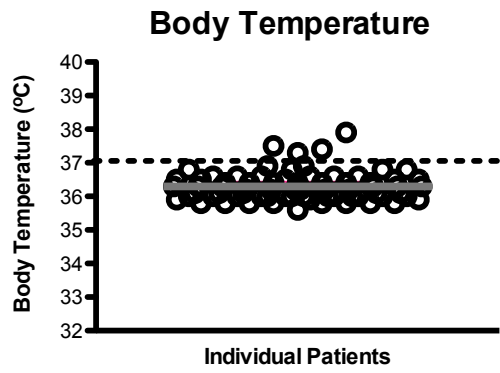

**Supplemental Figure 3. Body temperature of SSTI patients.** Body temperature was measured in infected patients on D0.

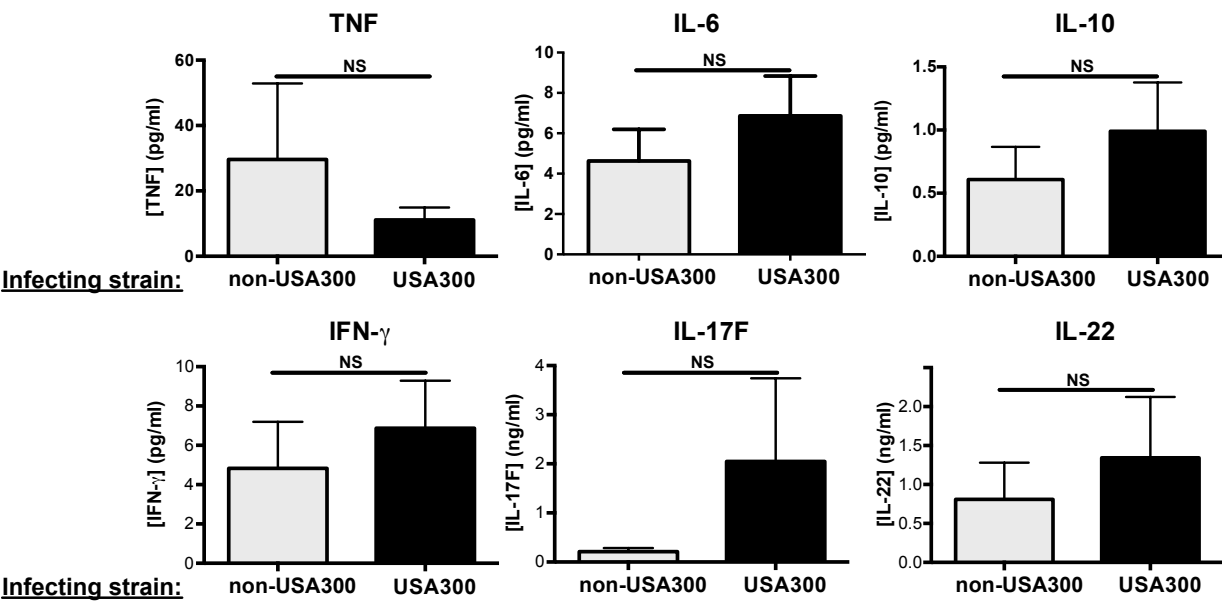

**Supplemental Figure 4. Serum cytokines are similar in SSTI patients infected with non-USA300 and USA300 *S. aureus* strain types.** Serum from SSTI patients on D0 was analyzed for cytokine content by multiplex and cytokine levels were compared between patients infected with documented non-USA300 (n=12) versus USA300 (n=20) *S. aureus* strain types. NS, not significant.
